# Supplementary material for: Effect of fibrous separators on the performance of lithium–sulfur batteries
Source: Royal Society of Chemistry journal article supplement (doi:10.1039/c7cp00310b), 2017-01-01
Supplement: c7cp00310b1.pdf [file c7cp00310b1.pdf]

Supporting Information

## Effect of Fibrous Separators on the Performance of Lithium-Sulfur Batteries

Soumyadip Choudhury,<sup>a,†\*</sup> Mazen Azizi,<sup>a</sup> Ivan Raguzin,<sup>a</sup> Michael Göbel,<sup>a</sup> Stefan Michel,<sup>a</sup>  
Frank. Simon,<sup>a</sup> Annett Willomitzer,<sup>b</sup> Viktor Mechtcherine,<sup>b</sup> Manfred Stamm,<sup>ac\*</sup>, Leonid Ionov<sup>d\*</sup>

<sup>a</sup>*Leibniz-Institut für Polymerforschung Dresden e.V., Hohe Str. 6, D-01069 Dresden, Germany,*

<sup>b</sup>*Technische Universität Dresden, Institut für Baustoffe, Georg-Schumann-Str. 7, 01187 Dresden, Germany*

<sup>c</sup>*Technische Universität Dresden, Physical Chemistry of Polymer Materials, D-01062 Dresden, Germany.*

<sup>d</sup>*College of Engineering, College of Family and Consumer Sciences, University of Georgia, Athens, GA 30602, USA*

<sup>†</sup>Present address: INM – Leibniz Institute for New Materials, Campus D2 2, 66123 Saarbrücken, Germany.

### Corresponding Authors

\*Email: soumya2827@gmail.com, stamm@ipfdd.de, ionov@uga.edu

**KEYWORDS:** lithium-sulfur batteries, separator, membrane, polysulfide shuttle, rechargeable batteries.

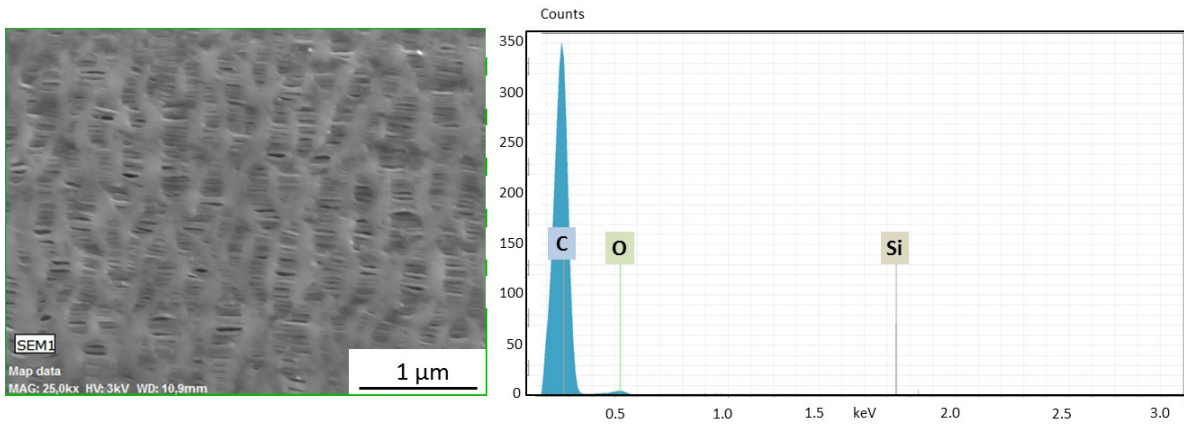

**Figure S1:**EDX spectra of Celgard separator.

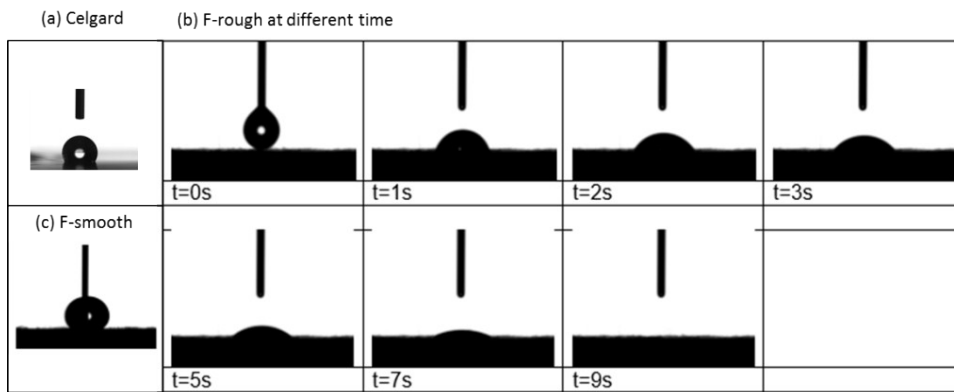

**Figure S2:** Contact angle measurements of different separators.

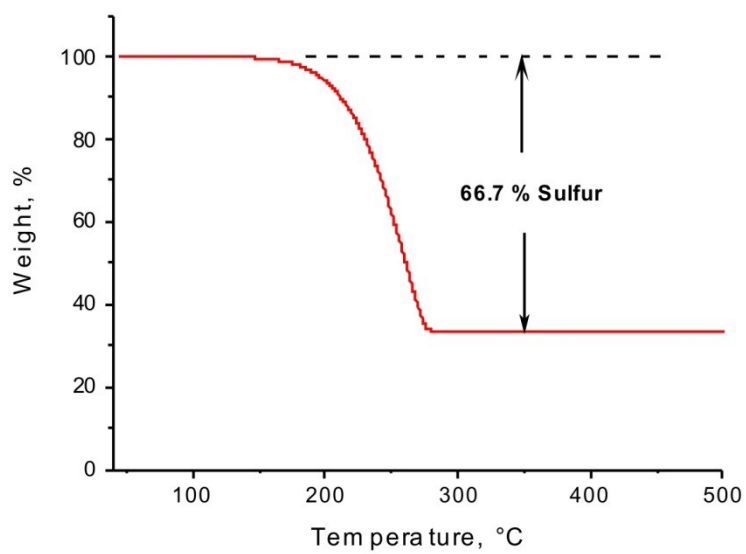

**Figure S3:** TGA results of carbon mixed with sulfur

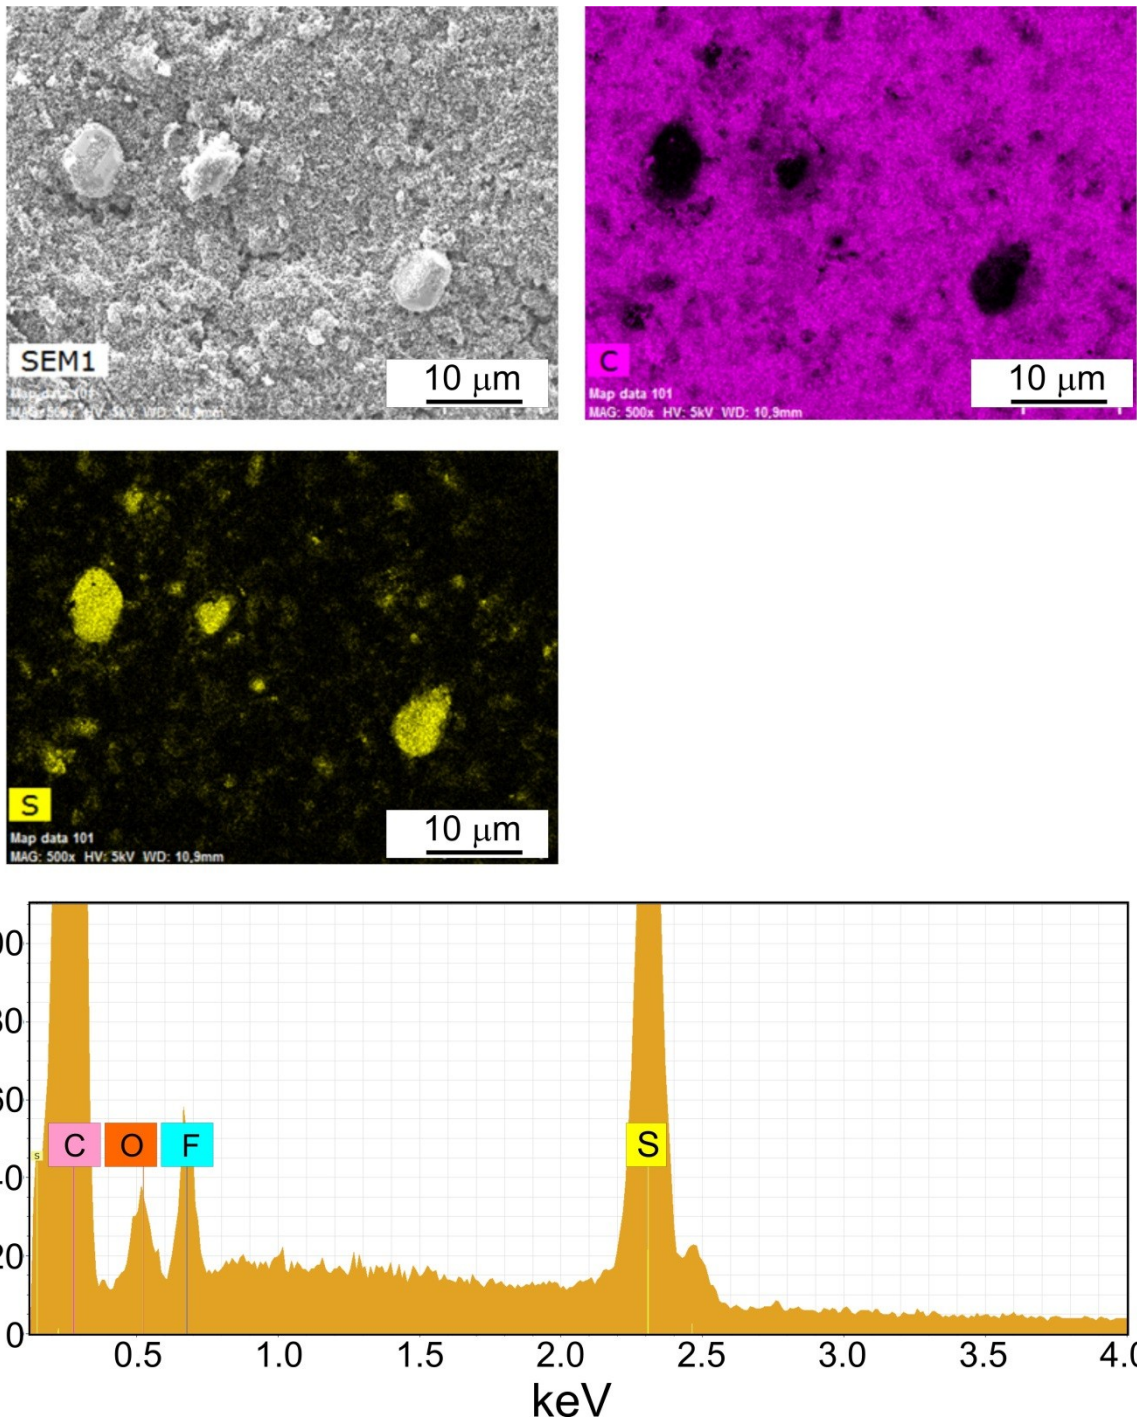

Figure S4: EDX results of carbon-sulfur cathode

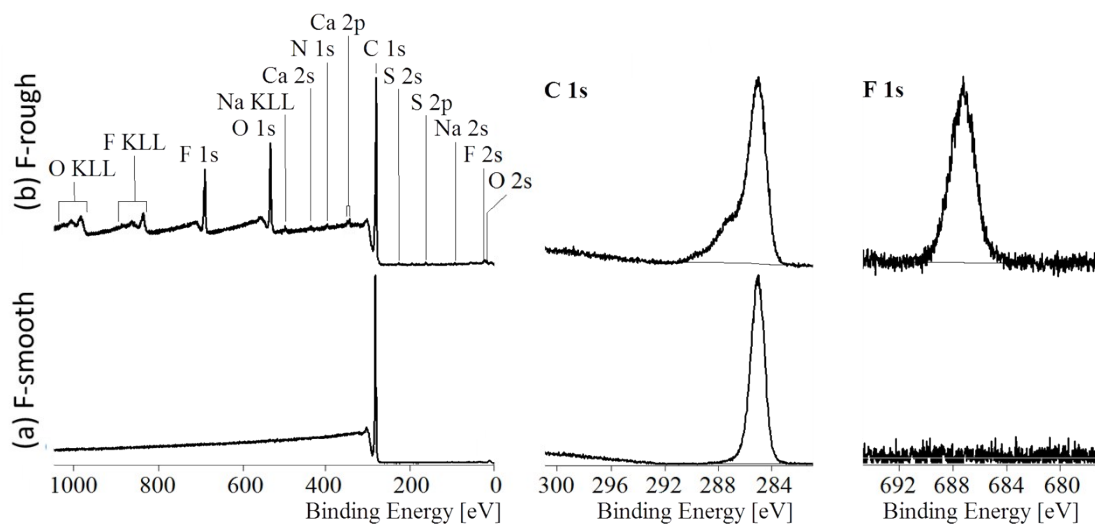

**Fig S5:** XPS wide-scan (left column), C 1s (middle column), and F 1s (right column) high-resolution element spectra of F-smooth (a) and F-rough (b) samples.

**Table S1:** Quantification report from XPS. BE and FWHM stand for “binding energy” and “full width at half maxima”, respectively.

| Sample   | Peak  | Position BE (eV) | FWHM (eV) | Atomic Conc % | Mass Conc % |
|----------|-------|------------------|-----------|---------------|-------------|
| Celgard  | C 1S  | 285.0            | 2.365     | 99.50         | 99.33       |
|          | O 1S  | 532.4            | 2.675     | 0.50          | 0.67        |
| F-smooth | C 1S  | 285.0            | 2.466     | 100.00        | 100.00      |
| F-rough  | C 1S  | 285.0            | 3.448     | 79.02         | 71.57       |
|          | O 1S  | 532.4            | 3.386     | 12.37         | 14.92       |
|          | F 1S  | 686.4            | 3.392     | <b>6.52</b>   | <b>9.34</b> |
|          | N 1s  | 400.0            | 1.417     | 0.63          | 0.67        |
|          | Na 1s | 1070.2           | 2.309     | 0.31          | 0.53        |
|          | Si 2p | 102.2            | 1.641     | 0.31          | 0.66        |
|          | S 2p  | 168.8            | 2.924     | 0.34          | 0.83        |
|          | Cl 2p | 201.0            | 1.276     | 0.09          | 0.24        |
| Ca 2p    | 348.0 | 2.279            | 0.41      | 1.24          |             |

**Table S2:** Weight contribution of separators in all combination in 2032 coin cells.

| Component                | Weight (g) | Weight fraction of separator (%) |        |         |          |               |                |        |
|--------------------------|------------|----------------------------------|--------|---------|----------|---------------|----------------|--------|
|                          |            | Cel                              | Cel 5x | F-rough | F-smooth | Cel + F-rough | Cel + F-smooth |        |
| Li                       | 0.0045     | 0.15                             | 0.73   | 0.61    | 0.41     | 0.76          | 0.56           |        |
| Celgard:                 | 0.0042     |                                  |        |         |          |               |                |        |
| Freudenberg_smooth       | 0.0118     |                                  |        |         |          |               |                |        |
| Freudenberg_rough        | 0.0175     |                                  |        |         |          |               |                |        |
| Coin cell parts          | 2.72       |                                  |        |         |          |               |                |        |
| Current collectors       | Cu         |                                  |        |         |          |               |                | 0.036  |
|                          | Ni         |                                  |        |         |          |               |                | 0.0175 |
| Cathode                  | 0.0036     |                                  |        |         |          |               |                |        |
| Electrolyte              | 0.057      |                                  |        |         |          |               |                |        |
| Total (with electrolyte) |            |                                  |        |         |          |               |                | 2.8428 |
